# Supplementary material for: Aminomethanesulfonic acid illuminates the boundary between full and partial agonists of the pentameric glycine receptor
Source: eLife. 2022 Aug 17;11:e79148. doi: 10.7554/eLife.79148 (PMC9462852; doi:10.7554/eLife.79148)
Supplement: Figure 1—source data 1. [file elife-79148-fig1-data1.xlsx]

## Sheet: Figure 1 C
Glycine			Hill equation fit				AMS			Hill equation fit				b-alanine			Hill equation fit				Taurine			Hill equation fit
concentration	current response normalised to maximum concentartion	S.D	concentration(mM)	normalized peak current			concentration	current response normalised to maximum concentartion	S.D	concentration(mM)	normalized peak current			concentration	current response normalised to maximum concentartion	S.D	concentration(mM)	normalized peak current			concentration	current response normalised to maximum concentartion	S.D	concentration(mM)	normalized peak current
0.1	0.05577	0.03305	0.01	0.00161			1	0.01276	0.00163	0.1	0.000279858			0.3	0.03438	0.00467	0.01	0.00154			0.3	0.00914	0	0.01	0.00107
0.3	0.12918	0.01644	0.01123	0.0019			3	0.09724	0.01133	0.10975	0.000332251			1	0.14225	0.02289	0.0115	0.00179			1	0.02104	0.00208	0.0115	0.00119
1	0.56836	0.04015	0.01262	0.00224			5	0.29177	0.0514	0.12045	0.000394447			3	0.33748	0.06401	0.01322	0.00206			3	0.06342	0.00496	0.01322	0.00133
3	0.80079	0.03104	0.01417	0.00264			10	0.54412	0.04008	0.13219	0.000468281			10	0.51409	0.05175	0.0152	0.00239			10	0.11446	0.00763	0.0152	0.00148
10	0.90086	0.03257	0.01592	0.00311			30	0.79765	0.0212	0.14508	0.000555926			30	0.61853	0.03151	0.01748	0.00276			30	0.13024	0.00367	0.01748	0.00165
30	0.96855	0.02595	0.01789	0.00367			100	0.88588	0.01593	0.15923	0.000659963			100	0.67108	0.02647	0.02009	0.00319			100	0.1537	0.00555	0.02009	0.00183
100	0.99382	0.01511	0.02009	0.00433						0.17475	0.000783452			300	0.68658	0.01372	0.0231	0.00369			300	0.1737	0.00355	0.0231	0.00204
			0.02257	0.0051						0.19179	0.000930024						0.02656	0.00426						0.02656	0.00227
			0.02535	0.00602						0.21049	0.0011						0.03054	0.00493						0.03054	0.00253
			0.02848	0.00709						0.23101	0.00131						0.03511	0.0057						0.03511	0.00281
			0.03199	0.00836						0.25354	0.00156						0.04037	0.00658						0.04037	0.00313
			0.03594	0.00985						0.27826	0.00185						0.04642	0.0076						0.04642	0.00348
			0.04037	0.01161						0.30539	0.00219						0.05337	0.00878						0.05337	0.00387
			0.04535	0.01367						0.33516	0.0026						0.06136	0.01014						0.06136	0.0043
			0.05094	0.01609						0.36784	0.00309						0.07055	0.0117						0.07055	0.00478
			0.05722	0.01893						0.4037	0.00366						0.08111	0.0135						0.08111	0.00532
			0.06428	0.02226						0.44306	0.00434						0.09326	0.01557						0.09326	0.00591
			0.07221	0.02617						0.48626	0.00515						0.10723	0.01795						0.10723	0.00656
			0.08111	0.03073						0.53367	0.00611						0.12328	0.02068						0.12328	0.00728
			0.09112	0.03606						0.5857	0.00724						0.14175	0.02382						0.14175	0.00807
			0.10235	0.04228						0.64281	0.00859						0.16298	0.0274						0.16298	0.00895
			0.11498	0.04951						0.70548	0.01018						0.18738	0.03151						0.18738	0.00992
			0.12915	0.0579						0.77426	0.01206						0.21544	0.03619						0.21544	0.01099
			0.14508	0.06761						0.84975	0.01428						0.24771	0.04153						0.24771	0.01217
			0.16298	0.0788						0.9326	0.01691						0.2848	0.0476						0.2848	0.01346
			0.18307	0.09166						1.02353	0.02						0.32745	0.05448						0.32745	0.01487
			0.20565	0.10637						1.12332	0.02365						0.37649	0.06226						0.37649	0.01642
			0.23101	0.12312						1.23285	0.02794						0.43288	0.07102						0.43288	0.01811
			0.2595	0.14207						1.35305	0.03297						0.4977	0.08086						0.4977	0.01996
			0.29151	0.16337						1.48497	0.03888						0.57224	0.09187						0.57224	0.02197
			0.32745	0.18716						1.62975	0.04578						0.65793	0.10411						0.65793	0.02415
			0.36784	0.21349						1.78865	0.05384						0.75646	0.11767						0.75646	0.02651
			0.4132	0.24239						1.96304	0.06321						0.86975	0.13259						0.86975	0.02906
			0.46416	0.2738						2.15443	0.07406						1	0.14891						1	0.0318
			0.5214	0.30757						2.36449	0.08658						1.14976	0.16665						1.14976	0.03475
			0.5857	0.34346						2.59502	0.10095						1.32194	0.18577						1.32194	0.0379
			0.65793	0.38115						2.84804	0.11736						1.51991	0.20623						1.51991	0.04125
			0.73907	0.42023						3.12572	0.13598						1.74753	0.22793						1.74753	0.04481
			0.83022	0.46021						3.43047	0.15695						2.00923	0.25072						2.00923	0.04857
			0.9326	0.50055						3.76494	0.18038						2.31013	0.27445						2.31013	0.05252
			1.04762	0.54073						4.13201	0.20632						2.65609	0.29891						2.65609	0.05665
			1.17681	0.58018						4.53488	0.23476						3.05386	0.32385						3.05386	0.06096
			1.32194	0.61842						4.97702	0.26559						3.51119	0.34902						3.51119	0.06542
			1.48497	0.65499						5.46228	0.29863						4.03702	0.37416						4.03702	0.07002
			1.6681	0.68955						5.99484	0.33357						4.64159	0.399						4.64159	0.07474
			1.87382	0.72182						6.57933	0.37004						5.3367	0.42329						5.3367	0.07954
			2.1049	0.75162						7.22081	0.40758						6.13591	0.44681						6.13591	0.08441
			2.36449	0.77887						7.92483	0.44565						7.0548	0.46934						7.0548	0.08932
			2.65609	0.80356						8.69749	0.48371						8.11131	0.49074						8.11131	0.09423
			2.98365	0.82573						9.54548	0.52119						9.32603	0.51087						9.32603	0.09912
			3.3516	0.84551						10.4762	0.55759						10.7227	0.52965						10.7227	0.10397
			3.76494	0.86302						11.4976	0.59244						12.3285	0.54703						12.3285	0.10873
			4.22924	0.87843						12.6186	0.62535						14.1747	0.563						14.1747	0.1134
			4.75081	0.89193						13.8489	0.65605						16.2975	0.57757						16.2975	0.11794
			5.3367	0.9037						15.1991	0.68435						18.7382	0.59079						18.7382	0.12233
			5.99484	0.91392						16.681	0.71015						21.5444	0.60272						21.5444	0.12656
			6.73415	0.92276						18.3074	0.73344						24.7708	0.61342						24.7708	0.13062
			7.56463	0.93038						20.0923	0.75427						28.4804	0.62298						28.4804	0.13448
			8.49753	0.93694						22.0513	0.77276						32.7455	0.63149						32.7455	0.13815
			9.54548	0.94257						24.2013	0.78905						37.6494	0.63903						37.6494	0.14161
			10.7227	0.9474						26.5609	0.80331						43.2876	0.6457						43.2876	0.14487
			12.045	0.95153						29.1505	0.81573						49.7702	0.65158						49.7702	0.14793
			13.5305	0.95505						31.9927	0.8265						57.2237	0.65674						57.2237	0.15078
			15.1991	0.95806						35.1119	0.83578						65.7933	0.66128						65.7933	0.15343
			17.0735	0.96063						38.5353	0.84377						75.6463	0.66525						75.6463	0.1559
			19.1791	0.96281						42.2924	0.85062						86.9749	0.66871						86.9749	0.15818
			21.5444	0.96467						46.4159	0.85647						100	0.67174						100	0.16028
			24.2013	0.96625						50.9414	0.86146						114.976	0.67438						114.976	0.16221
			27.1859	0.96759						55.9081	0.86571						132.194	0.67668						132.194	0.16399
			30.5386	0.96873						61.3591	0.86932						151.991	0.67868						151.991	0.16561
			34.3047	0.9697						67.3415	0.87239						174.753	0.68042						174.753	0.1671
			38.5353	0.97052						73.9072	0.87499						200.923	0.68192						200.923	0.16846
			43.2876	0.97122						81.1131	0.87719						231.013	0.68323						231.013	0.16969
			48.626	0.97181						89.0215	0.87905						265.609	0.68437						265.609	0.17082
			54.6228	0.97231						97.701	0.88063						305.386	0.68536						305.386	0.17184
			61.3591	0.97274						107.227	0.88196						351.119	0.68621						351.119	0.17277
			68.9261	0.9731						117.681	0.88308						403.702	0.68695						403.702	0.17361
			77.4264	0.97341						129.155	0.88403						464.159	0.68759						464.159	0.17437
			86.9749	0.97367						141.747	0.88483						533.67	0.68814						533.67	0.17506
			97.701	0.97389						155.568	0.88551						613.591	0.68862						613.591	0.17568
			109.75	0.97407						170.735	0.88608						705.48	0.68904						705.48	0.17624
			123.285	0.97423						187.382	0.88656						811.131	0.6894						811.131	0.17675
			138.489	0.97436						205.651	0.88696						932.603	0.68971						932.603	0.17721
			155.568	0.97448						225.702	0.8873						1000	0.68998						1000	0.17762
			174.753	0.97457						247.708	0.88759
			196.304	0.97466						271.859	0.88783
			220.513	0.97473						298.365	0.88804
			247.708	0.97478						327.455	0.88821
			278.256	0.97483						359.381	0.88836
			312.572	0.97488						394.421	0.88848
			351.119	0.97491						432.876	0.88858
			394.421	0.97494						475.081	0.88867
			443.062	0.97497						521.401	0.88874
			497.702	0.97499						572.237	0.8888
			559.081	0.97501						628.029	0.88886
			628.029	0.97502						689.261	0.8889
			705.48	0.97504						756.463	0.88894
			792.483	0.97505						830.218	0.88897
			890.215	0.97506						911.163	0.88899
			1000	0.97507						1000	0.88901
