# Supplementary material for: Aminomethanesulfonic acid illuminates the boundary between full and partial agonists of the pentameric glycine receptor
Source: eLife. 2022 Aug 17;11:e79148. doi: 10.7554/eLife.79148 (PMC9462852; doi:10.7554/eLife.79148)
Supplement: Figure 2—source data 1. [file elife-79148-fig2-data1.xlsx]

## Sheet: Figure 2 C source data
100 mM Glycine Popen	100 mM AMS Popen	100 mM b-alanine Popen	500 mM Taurine Popen
0.968	0.7615	0.328	0.0397				Agonist	mean maxPopen	S.D	number of clusters
0.982	0.9935	0.765	0.0522				Glycine	0.956446	0.0618373	92
0.991	0.87457	0.437	0.0433				AMS	0.851676	0.188886	146
0.996	0.996413	0.781	0.0058				b-alanine	0.536577	0.236368	52
0.991	0.966223	0.98	0.012				taurine	0.122973	0.118467	37
0.996	0.995	0.772	0.316
0.996	0.975	0.158	0.02
0.987	0.793028	0.2	0.06
0.977	0.28	0.59	0.06
0.957	0.992999	0.713	0.27
0.994	0.98677	0.571	0.04
0.992	0.99525	0.71	0.043
0.992	0.721419	0.53	0.045
0.99	0.944951	0.61	0.053
0.994	0.957882	0.56	0.33
0.982	0.97987	0.46	0.39
0.957	0.978879	0.54	0.26
0.977	0.984248	0.49	0.09
0.945	0.922269	0.42	0.08
0.986	0.928823	0.982	0.35
0.991	0.679039	0.871	0.06
0.982	0.728037	0.838	0.16
0.988	0.9933	0.846	0.41
0.969	0.4286	0.941	0.06
0.985	0.625	0.43	0.06
0.98	0.7829	0.22	0.076
0.99	0.980079	0.145	0.12
0.975	0.9873	0.323	0.15
0.987	0.926505	0.279	0.13
0.981	0.90742	0.31	0.053
0.969	0.915839	0.298	0.055
0.941	0.9017	0.263	0.16
0.993	0.999261	0.21	0.022
0.986	0.9316	0.166	0.036
0.987	0.849865	0.21	0.028
0.763	0.944	0.136	0.31
0.993	0.894011	0.5	0.1
0.814	0.993	0.467
0.892	0.9576	0.317
0.681	0.852191	0.7
0.966	0.891	0.588
0.984	0.1	0.631
0.975	0.989	0.438
0.662	0.972	0.626
0.994	0.994	0.589
0.991	0.961	0.672
0.98	0.949	0.644
0.93	0.92	0.627
0.968	0.985	0.679
0.785	0.91	0.81
0.975	0.9607	0.767
0.968	0.908	0.764
0.966	0.941
0.941	0.956
0.972	0.951
0.965	0.955
0.959	0.969
0.973	0.968
0.981	0.958
0.964	0.961
0.985	0.962
0.989	0.945
0.972	0.983
0.974	0.936
0.974	0.967
0.982	0.974
0.976	0.975
0.995	0.995
0.962	0.529
0.988	0.48
0.983	0.929
0.95	0.877
0.979	0.939
0.982	0.419
0.994	0.915
0.979	0.93
0.99	0.864
0.953	0.913
0.955	0.822
0.957	0.614
0.973	0.928
0.978	0.931
0.971	0.967
0.97	0.979
0.927	0.951
0.962	0.6
0.974	0.974
0.889	0.476
0.856	0.705
0.849	0.939
0.874	0.952
0.855	0.951
	0.862
	0.919
	0.927
	0.895
	0.956
	0.99
	0.989
	0.971
	0.966
	0.99
	0.944
	0.97
	0.985
	0.933
	0.355
	0.341
	0.264
	0.417
	0.929
	0.98
	0.964
	0.953
	0.928
	0.954
	0.876
	0.966
	0.965
	0.909
	0.992
	0.805
	0.808
	0.875
	0.877
	0.816
	0.874
	0.656
	0.765
	0.862
	0.349
	0.832
	0.8122
	0.614
	0.981
	0.958
	0.909
	0.373
	0.59
	0.976
	0.502
	0.593
	0.59
	0.608
	0.511
	0.893

## Sheet: From Ivica et al 2021
Glycine Popen at pH 7.4	b-alanine Popen at pH 7.4	Taurine Popen at pH 7.4
0.9829	0.9909	0.76528					Agonist	mean maxPopen	S.D	number of clusters
0.99024	0.97862	0.43468					Glycine	0.972773	0.045098	48
0.98878	0.97843	0.8761					b-alanine	0.906192	0.208545	30
0.98688	0.98559	0.91769					Taurine	0.661569	0.241547	71
0.99692	0.66412	0.92762
0.99682	0.97212	0.68791
0.94338	0.9893	0.96505
0.97822	0.99378	0.67505
0.99569	0.99186	0.94935
0.99225	0.9923	0.72399
0.9953	0.99847	0.70284
0.99412	0.16524	0.74184
0.98075	0.18641	0.70247
0.99812	0.98338	0.74772
0.97853	0.91794	0.88121
0.98857	0.8565	0.8681
0.98027	0.94063	0.50328
0.91527	0.99235	0.28385
0.99732	0.97782	0.80083
0.99213	0.98078	0.71109
0.95337	0.98795	0.45893
0.99696	0.95966	0.6698
0.85883	0.97856	0.73627
0.99281	0.96746	0.83652
0.998	0.96734	0.88504
0.97863	0.98942	0.87442
0.99757	0.97841	0.80095
0.785	0.98569	0.89582
0.9978	0.93403	0.87271
0.96044	0.90069	0.86087
0.97444		0.91075
0.97698		0.82411
0.97252		0.84941
0.99982		0.64349
0.97533		0.84081
0.99202		0.90671
0.99314		0.91746
0.97235		0.91186
0.98521		0.49484
0.97112		0.32625
0.97953		0.07853
0.81197		0.23455
0.99348		0.14506
0.91465		0.24648
0.99411		0.22495
0.99906		0.22663
0.99808		0.23513
0.99744		0.31585
		0.27219
		0.33262
		0.90332
		0.86447
		0.9818
		0.75999
		0.95644
		0.53859
		0.44639
		0.43302
		0.43453
		0.45805
		0.49018
		0.74176
		0.65579
		0.74909
		0.72775
		0.70161
		0.77999
		0.60122
		0.61733
		0.53997
		0.89512
