# Supplementary material for: Aminomethanesulfonic acid illuminates the boundary between full and partial agonists of the pentameric glycine receptor
Source: eLife. 2022 Aug 17;11:e79148. doi: 10.7554/eLife.79148 (PMC9462852; doi:10.7554/eLife.79148)
Supplement: Table 1—source data 1. [file elife-79148-table1-data1.xlsx]

## Sheet: Sheet1
Glycine (8 cells)
Cell 1		Cell 2		Cell 3		Cell 4		Cell 5		Cell 6		Cell 7		Cell 8
concentration (mM)	current response (pA)	concentration (mM)	current response (pA)	concentration (mM)	current response (pA)	concentration (mM)	current response (pA)	concentration (mM)	current response (pA)	concentration (mM)	current response (pA)	concentration (mM)	current response (pA)	concentration (mM)	current response (pA)
0.1	697.798	0.1	107.175	0.3	600.981	0.3	401.253	0.3	570.09	0.3	261	0.3	152.945	0.1	44
0.3	1098	0.3	747.08	1	3625.77	1	1460.77	1	3554.52	1	1146.82	1	949.691	0.3	834.127
1	3648.16	1	3332.63	3	4998.91	3	2786.86	3	3905.28	1	1420.36	3	1646.01	1	3333.17
3	3913.76	1	2798.41	10	5361.93	10	3233.32	10	4756.12	3	2230	10	2273.55	3	4612.11
10	4179.78	3	3676.56	30	5662.28	30	2793.26	30	4512.88	10	2213.62	30	2434.82	10	4665.29
30	5161.05	10	4943.5	30	6044.91	100	3801.38	100	5122.14	10	2261.55	100	2302.24	30	4521.16
100	6013.92	30	4870.23	100	5993.09	100	3121.46	100	5172.99	30	3414.15	100	2399.17	100	5180.51
100	5080.09	100	5299.14	100	6119.1	100	2912.9	100	4445.73	30	2528.83	100	2341.17	100	4881.01
100	4944.8	100	5390.03	100	5777.44					100	2944.31			100	4058.65
100	4611.57	100	5064.06							100	3290.2			100	4355.2
		100	4851.47							100	3060.93			100	4130.16
		100	4659.2							100	2452.68
																				Mean	S.D
Imax (pA)	5114.64	Imax (pA)	5001.9	Imax (pA)	6005.2	Imax (pA)	3248.31	Imax (pA)	4964.58	Imax (pA)	2984.47	Imax (pA)	2385.23	Imax (pA)	4650.37				Imax(nA)	4.29434	1.26102
EC50 (mM)	0.69733	EC50 (mM)	0.82642	EC50 (mM)	0.8275	EC50 (mM)	1.09185	EC50 (mM)	0.80152	EC50 (mM)	1.51798	EC50 (mM)	1.49707	EC50 (mM)	0.57295			average from 8 cells-->	EC50(uM)	979.077	357.287
nH	0.99441	nH	1.33604	nH	1.04984	nH	1.40748	nH	1.04595	nH	0.93843	nH	1.38992	nH	1.44549				nH	1.20095	0.212081
AMS (9 cells)
Cell 1		Cell 2		Cell 3		Cell 4		Cell 5		Cell 6		Cell 7		Cell 8		Cell 9
concentration (mM)	current response (pA)	concentration (mM)	current response (pA)	concentration (mM)	current response (pA)	concentration (mM)	current response (pA)	concentration (mM)	current response (pA)	concentration (mM)	current response (pA)	concentration (mM)	current response (pA)	concentration (mM)	current response (pA)	concentration (mM)	current response (pA)
1	61.1568	3	260.929	3	687.427	1	80	1	86	3	428.266	3	935.468	1	80	1	64
3	410.282	10	2284.73	5	982.097	3	465.047	3	1023.38	5	1399.95	5	1948.04	3	793.547	3	260.755
10	2573.56	30	3909.28	10	2772.51	3	738.444	5	2530.92	10	3757.73	10	3921.92	5	2583.59	5	677.971
30	3249.84	30	3217.06	30	4869.52	5	2356.77	10	5664.4	30	6204.63	30	5474.04	10	3509.13	10	2094.24
100	3700.28	100	3740.59	100	6597.55	5	2483.3	30	8951.19	100	7837.32	100	7553.51	30	4797.67	30	5212.2
100	2651.98	100	4375.82	100	4912.92	10	3202.55	100	10168.1	100	6596.48	100	6189.98	100	5823.01	100	7254.97
100	3375.57	100	4178.64	100	5691.81	10	3531.16	100	9472.54	100	7031.66	100	5403.85	100	4791.92	100	6811.59
100	2652.67	100	3528	100	5455.3	30	3992.33	100	8292.12					100	4845.56	100	5943.3
						30	4070.64	100	7316.46
						100	5093.47
						100	4122.15
						100	4711.52
						100	4823.41
						100	4420.59
						100	4717.82
																				Mean	S.D
Imax (pA)	3156.2	Imax (pA)	3991.27	Imax (pA)	5771.34	Imax (pA)	4529.71	Imax (pA)	8915.39	Imax (pA)	7171.77	Imax (pA)	6459.14	Imax (pA)	5132.39	Imax (pA)	6784.31		Imax(nA)	5.76795	1.77844
EC50 (mM)	5.73426	EC50 (mM)	8.93276	EC50 (mM)	10.8502	EC50 (mM)	5.53901	EC50 (mM)	7.59899	EC50 (mM)	9.97835	EC50 (mM)	8.23744	EC50 (mM)	5.95031	EC50 (mM)	15.1729	average from 9 cells-->	EC50(uM)	8666.03	3081.68
nH	2.17417	nH	1.90496	nH	1.74626	nH	2.10969	nH	2.28821	nH	1.99282	nH	1.57723	nH	1.84945	nH	1.94736		nH	1.95446	0.219205
b-alanine (6 cells)
Cell 1		Cell 2		Cell 3		Cell 4		Cell 5		Cell 6
concentration (mM)	current response (pA)	concentration (mM)	current response (pA)	concentration (mM)	current response (pA)	concentration (mM)	current response (pA)	concentration (mM)	current response (pA)	concentration (mM)	current response (pA)
1	554.578	0.3	181	0.3	193	1	370.23	0.3	87	0.3	238
3	1548.06	1	818	1	1037.42	3	643.308	1	416.165	1	1132
10	2859.9	3	1458.64	3	2992.25	10	2296.12	3	1197.21	3	2375.85
30	3134.68	10	2284.56	10	3605.63	30	2957.64	10	1463.96	10	3023.67
100	3633.61	30	2850.12	30	3692.51	100	3574.66	30	2269.89	30	3697.37
300	4210.8	100	3591.61	100	2958.44	300	3524.68	100	2525.65	100	3887.86
300	3228.43	300	2884.8	300	3289.25	300	2933.97	300	3379.67	300	3682.65
300	3636.91	300	3475.66	300	2859.88	300	3550.77	300	2635.78	300	3904.43
300	3511.19	300	3761.1	300	4073.27	300	3194.78	300	2770.77	300	3862.37
		300	3578.66	300	3751.17			300	2660.88	300	4037.69
										300	3934.58
										300	3600.49
																				Mean	S.D
Imax (pA)	3650.36	Imax (pA)	3562.67	Imax (pA)	3474.5	Imax (pA)	3356.08	Imax (pA)	3032.71	Imax (pA)	3858.43								Imax(nA)	3.48913	0.280722
EC50 (mM)	3.90549	EC50 (mM)	4.77887	EC50 (mM)	1.39229	EC50 (mM)	6.53532	EC50 (mM)	8.39783	EC50 (mM)	2.24872							average from 6cells-->	EC50(uM)	4543.09	2626.09
nH	1.1897	nH	0.86208	nH	1.77064	nH	1.5704	nH	0.75839	nH	1.1048								nH	1.20934	0.395141
taurine (6 cells)
Cell 1		Cell 2		Cell 3		Cell 4		Cell 5		Cell 6
concentration (mM)	current response (pA)	concentration (mM)	current response (pA)	concentration (mM)	current response (pA)	concentration (mM)	current response (pA)	concentration (mM)	current response (pA)	concentration (mM)	current response (pA)
1	60	0.3	98	1	112.376	1	83	1	115.422	1	118.906
3	166	1	323.713	3	258.211	3	220.18	3	408.64	3	547.5
10	382.18	3	955.922	30	556.858	10	389.267	10	631.138	10	948.01
30	395.927	10	1502.97	100	701.171	30	520	30	825.269	30	1100.85
100	506.295	30	1577.87	300	791.785	100	576	100	845.958	100	1433.07
300	553.441	100	1772.94	300	779.424	300	718.001	300	1194.05	300	1913.38
300	512.059	300	2367.04	300	756.444	300	666.411	300	1052.43	300	1480.61
300	504.886	300	2076.35			300	662.537	300	990.487	300	1455.41
300	557.078	300	1631.95			300	705.224	300	1101.72	300	1520.16
		300	1798.85							300	1219.78
		300	1861.17
																				Mean	S.D
Imax (pA)	536.284	Imax (pA)	1929.67	Imax (pA)	855.045	Imax (pA)	727.003	Imax (pA)	1148.09	Imax (pA)	1572.62								Imax(nA)	1.12812	0.534077
EC50 (mM)	6.03212	EC50 (mM)	3.56582	EC50 (mM)	11.5831	EC50 (mM)	9.47656	EC50 (mM)	8.93056	EC50 (mM)	7.61209							average from 6cells-->	EC50(uM)	7866.71	2809.38
nH	1.01828	nH	1.04269	nH	0.69858	nH	0.77119	nH	0.71837	nH	0.87321								nH	0.85372	0.149912
